# Supplementary material
Source: PubMed Central journal article supplement (PMC3391718)

## Supplementary Materials

### Evidence of Fe<sup>3+</sup> interaction with the plug domain of the outer membrane transferrin receptor protein of *Neisseria gonorrhoeae*: Implications for Fe transport

Sambuddha Banerjee,<sup>a</sup> Claire J. Parker Siburt,<sup>a</sup> Shreni Mistry,<sup>b</sup> Jennifer M. Noto,<sup>b</sup> Patrick DeArmond,<sup>a</sup> Michael C. Fitzgerald,<sup>a</sup> Lisa A. Lambert,<sup>c</sup> Cynthia N. Cornelissen,<sup>b</sup> and Alvin L. Crumbliss<sup>\*a</sup>

<sup>a</sup> Department of Chemistry, Duke University, Durham, NC-27708-0346, USA, E-mail: Alvin.Crumbliss@duke.edu. <sup>b</sup> Department of Microbiology and Immunology, Virginia Commonwealth University Medical Center, Richmond, VA. <sup>c</sup> Department of Biology, Chatham University, Pittsburgh, PA.

Figure captions and figures

**Fig. SP1:** Fluorescence emission spectra of S3 peptide in the absence (band with highest intensity) and in presence of increasing aliquots of Fe(ClO<sub>4</sub>)<sub>3</sub>. Conditions: 100 mM Tris at pH 7.5; [S3] = 20 μM; with final [S3]:[Fe<sup>3+</sup>] = 1:2.5 excitation at 285 nm, using a 1 cm path length cuvette at room temperature.

**Fig. SP2:** Plots of % quenching of the 310 nm fluorescence emission band (Q%) vs total Fe<sup>3+</sup> added ([Fe]<sub>T</sub>) according to Equation (7) for **A**) peptide S2 and **B**) peptide S3 in 100 mM Tris buffer at pH 7.5. [S2] = 20 μM; [S3] = 20 μM. The dots represent actual data points and the smooth lines are the best fit for the data according to Equation (7) where K<sub>d</sub> = 5 X 10<sup>-4</sup> M for **A**) and K<sub>d</sub> = 1 X 10<sup>-6</sup> M for **B**). For both S2 and S3 Q<sub>max</sub> = 100 %.

**Fig. SP3:** Fluorescence emission spectrum of AAA mutated recombinant TbpA plug protein (EIEYE → EIAAA), 20 μM in 100 mM Tris at pH 7.5, excitation at 285 nm, 1 cm pathlength. The broad band at ~334 nm is attributed to excited state deprotonation of one or all of the three remaining tyrosines (Y58, Y75 and Y98). See text and ref. (1) for details.

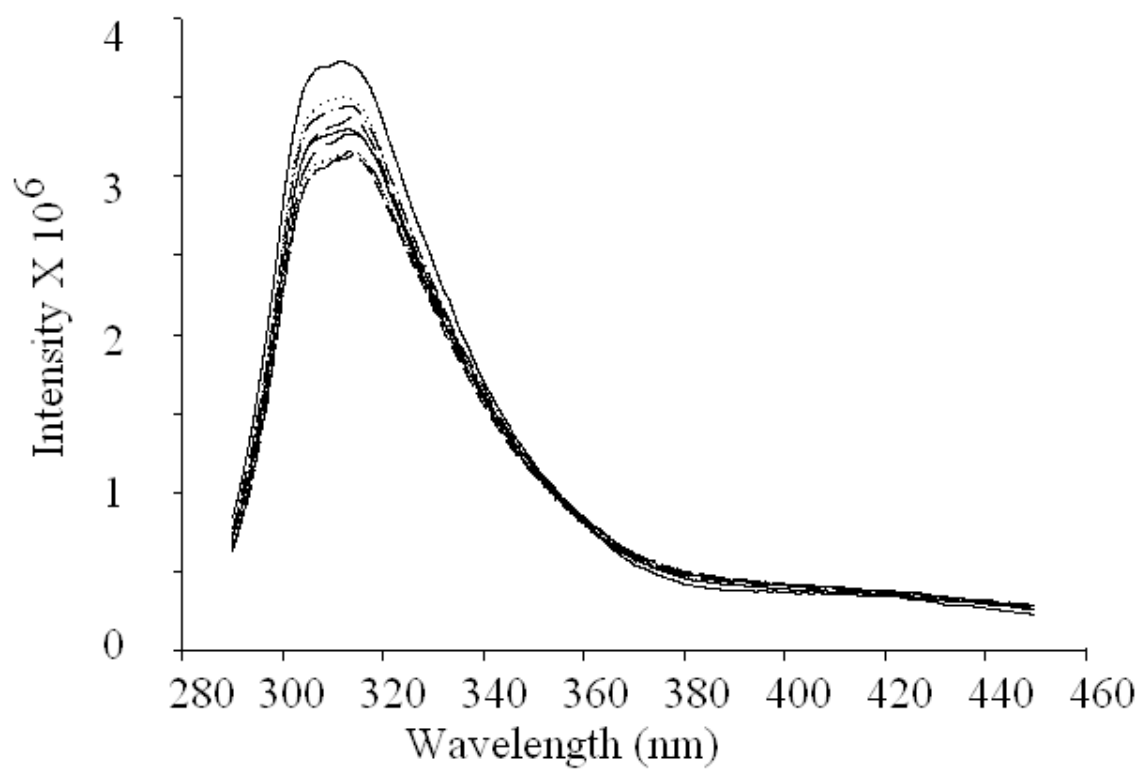

Fig. SP1

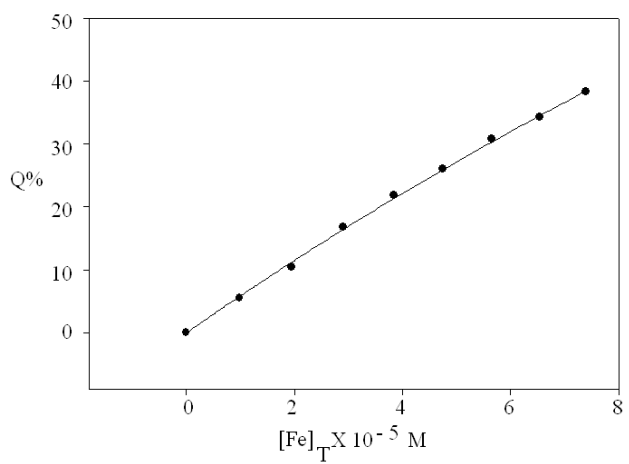

A)  
Fig. SP2

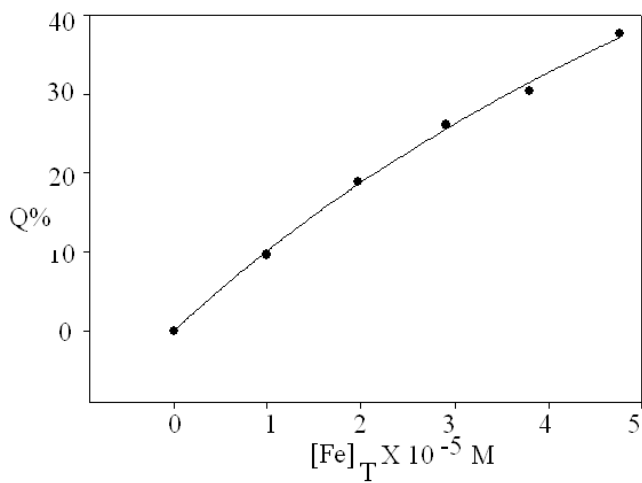

B)

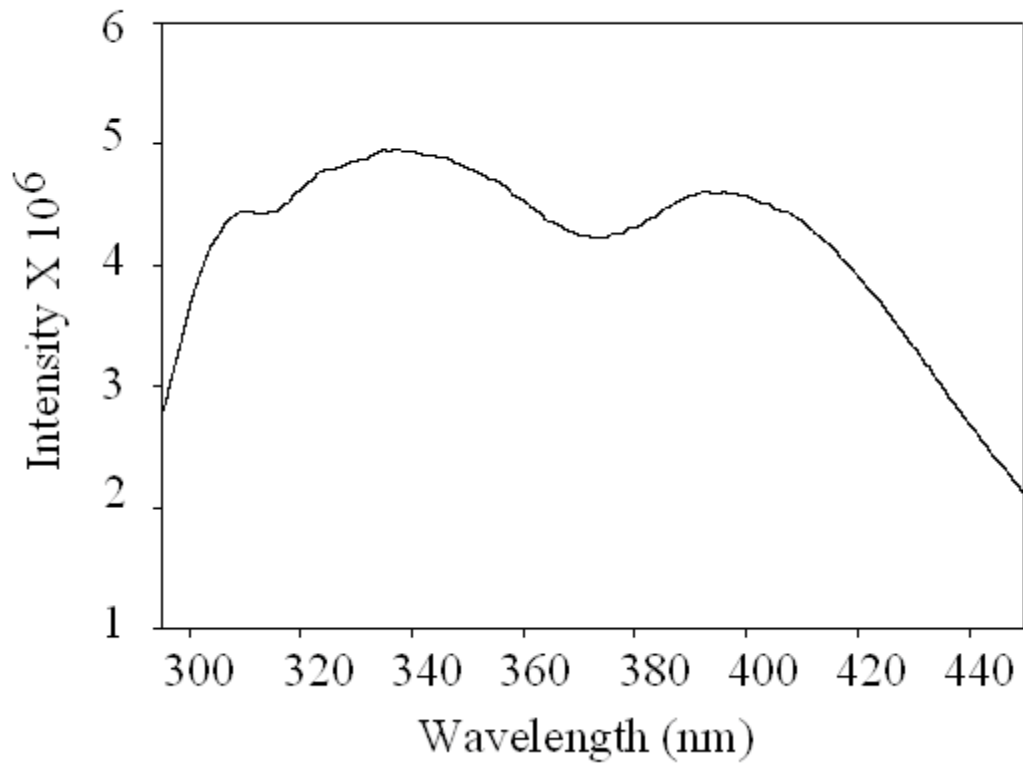

Fig. SP3

**Reference**

1. L. J. Libertini and E. W. Small, *Biophys. J.*, 1985, **47**, 765-772.

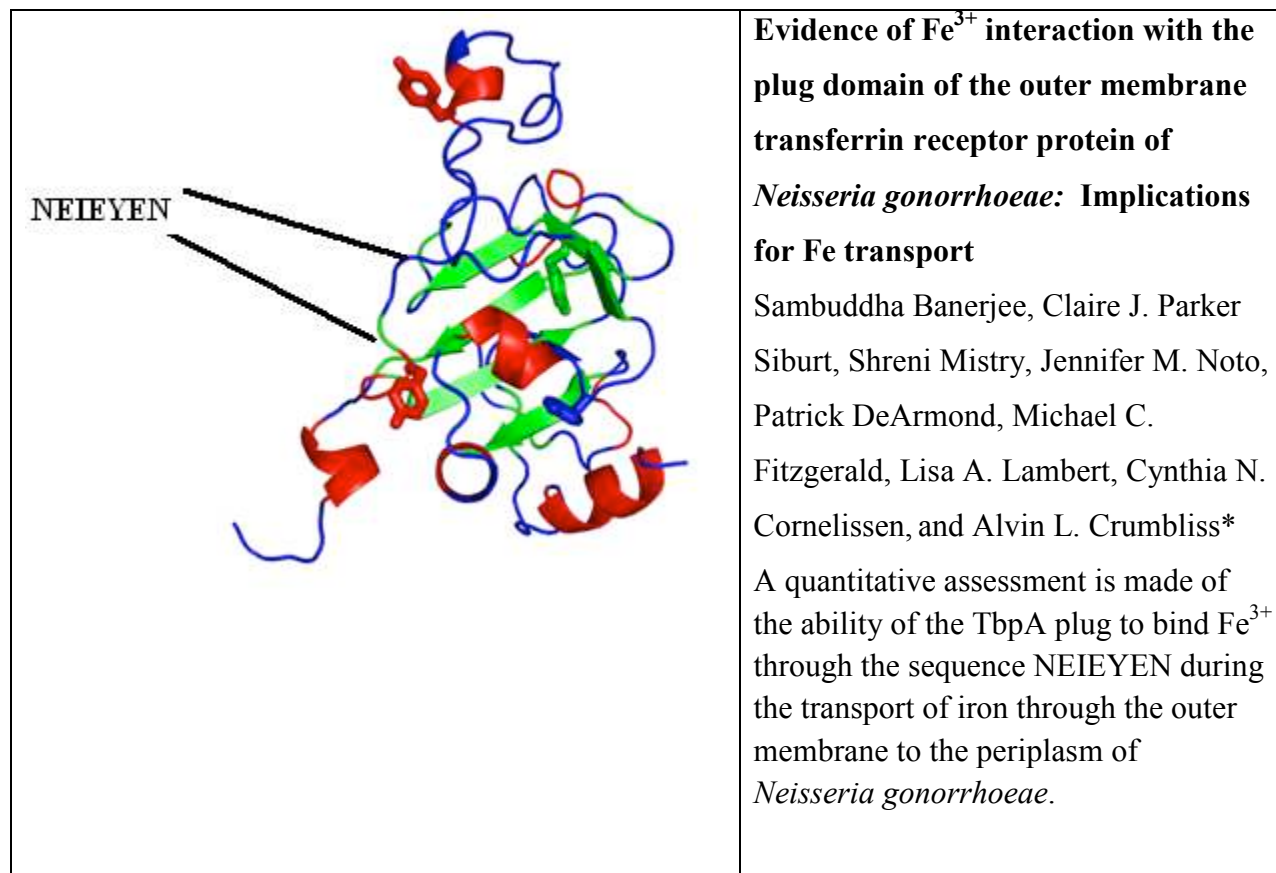

Supplement: NIHMS385739-supplement-supplement_1.pdf [file NIHMS385739-supplement-supplement_1.pdf]
